# Supplementary material for: Off-Stoichiometry Thiol–Enes Polymers Containing Silane Groups for Advanced Packaging Technologies
Source: MDPI journal article supplement (doi:10.3390/polym14101988), 2022-05-13
Supplement: s1 [file s1]

## Off-stoichiometry thiol–enes polymers containing silane groups for advanced packaging technologies

Kirill Puchnin\*, Dmitriy Ryazantsev, Vitaliy Grudtsov, Yaroslav Golubev and Alexander Kuznetsov  
puchninkv@yandex.ru

**Table S1.** OSTE-MS polymer size change during conditioning in various solvents

| Solvent            | $\Delta l$ , % |             |             |
|--------------------|----------------|-------------|-------------|
| Time, h            | 1              | 24          | 168         |
| Methanol           | -0.3           | -1.2        | -1.7        |
| Ethanol            | -0.3           | -0.6        | -0.7        |
| Hexane             | -0.4           | -0.9        | -0.4        |
| Decane             | -0.5           | -1.0        | -0.7        |
| 2-Propanol         | 0.5            | 0.1         | 0.1         |
| Benzene            | -0.2           | -0.3        | -0.2        |
| Limonene           | 0.1            | -0.3        | 0.0         |
| Toluene            | -0.1           | -1.5        | -2.0        |
| Tetrachloromethane | 0.0            | -0.1        | -1.6        |
| Ethyl acetate      | 0.0            | -0.1        | 0.4         |
| 2-Butanone         | 0.1            | -0.2        | 0.5         |
| Acetic acid        | -0.3           | -0.9        | -2.8        |
| Dimethyl sulfoxide | 0.8            | 0.9         | 3.8         |
| Tetrahydrofuran    | -0.4           | 0.4         | 4.0         |
| Acetone            | 0.0            | 0.2         | 3.2         |
| Acetonitrile       | -0.4           | 1.0         | 4.2         |
| Dimethylformamide  | 0.4            | 2.9         | 8.7         |
| Dichloromethane    | 0.2            | degradation | degradation |
| Chloroform         | 0.1            | degradation | degradation |

**Table S2.** OSTE-MS polymer weight change during conditioning in various solvents

| Solvent            | $\Delta m$ , % |     |      |
|--------------------|----------------|-----|------|
| Time, h            | 1              | 24  | 168  |
| Methanol           | 0.0            | 0.1 | 0.2  |
| Ethanol            | 0.1            | 0.1 | 0.1  |
| Hexane             | -0.1           | 0.0 | 0.0  |
| Decane             | -0.1           | 0.0 | 0.0  |
| 2-Propanol         | 0.0            | 0.0 | 0.0  |
| Benzene            | 0.0            | 0.1 | 0.2  |
| Limonene           | 0.1            | 0.2 | 0.3  |
| Toluene            | 0.0            | 0.0 | 0.1  |
| Tetrachloromethane | 0.0            | 0.0 | 0.0  |
| Ethyl acetate      | 0.1            | 0.5 | 1.1  |
| 2-Butanone         | 0.1            | 0.6 | 1.9  |
| Acetic acid        | 0.0            | 0.0 | -5.5 |

|                    |     |             |             |
|--------------------|-----|-------------|-------------|
| Dimethyl sulfoxide | 0.5 | 2.5         | 5.7         |
| Tetrahydrofuran    | 0.3 | 2.2         | 6.1         |
| Acetone            | 0.4 | 2.3         | 6.4         |
| Acetonitrile       | 0.8 | 3.8         | 9.3         |
| Dimethylformamide  | 1.0 | 3.7         | 12.1        |
| Dichloromethane    | 4.9 | degradation | degradation |
| Chloroform         | 2.7 | degradation | degradation |

**Table S3.** OSTE-MS polymer hardness change during conditioning in various solvents

| Solvent            | $\Delta m$ , % |             |             |
|--------------------|----------------|-------------|-------------|
| Time, h            | 1              | 24          | 168         |
| Methanol           | 82.0           | 83.0        | 82.0        |
| Ethanol            | 83.0           | 83.0        | 83.0        |
| Hexane             | 82.0           | 83.5        | 83.5        |
| Decane             | 82.0           | 84.0        | 84.0        |
| 2-Propanol         | 82.5           | 82.0        | 84.0        |
| Benzene            | 84.0           | 84.0        | 83.0        |
| Limonene           | 83.0           | 82.0        | 82.5        |
| Toluene            | 83.5           | 83.0        | 82.5        |
| Tetrachloromethane | 83.5           | 82.0        | 83.5        |
| Ethyl acetate      | 83.5           | 84.0        | 83.0        |
| 2-Butanone         | 83.0           | 82.5        | 80.0        |
| Acetic acid        | 84.0           | 83.0        | 82.5        |
| Dimethyl sulfoxide | 83.5           | 79.5        | 77.0        |
| Tetrahydrofuran    | 83.0           | 81.5        | 76.0        |
| Acetone            | 83.0           | 74.5        | 69.0        |
| Acetonitrile       | 81.0           | 73.0        | 58.0        |
| Dimethylformamide  | 81.5           | 77.5        | 69.5        |
| Dichloromethane    | 75.0           | degradation | degradation |
| Chloroform         | 80.0           | degradation | degradation |

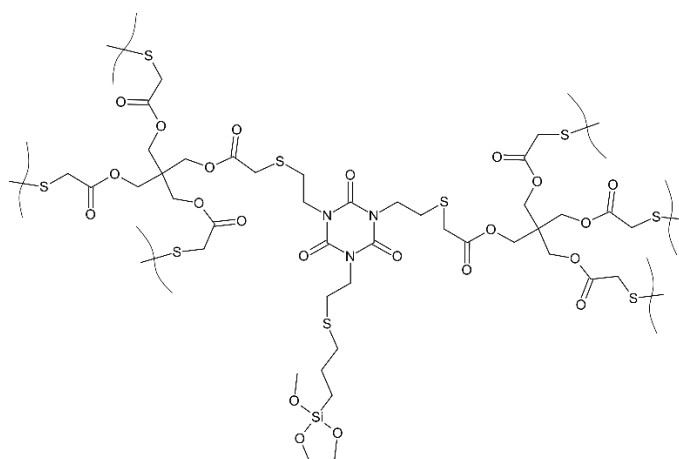

**Figure S1.** The linear fragment of OSTE-MS polymer containing a silane group.

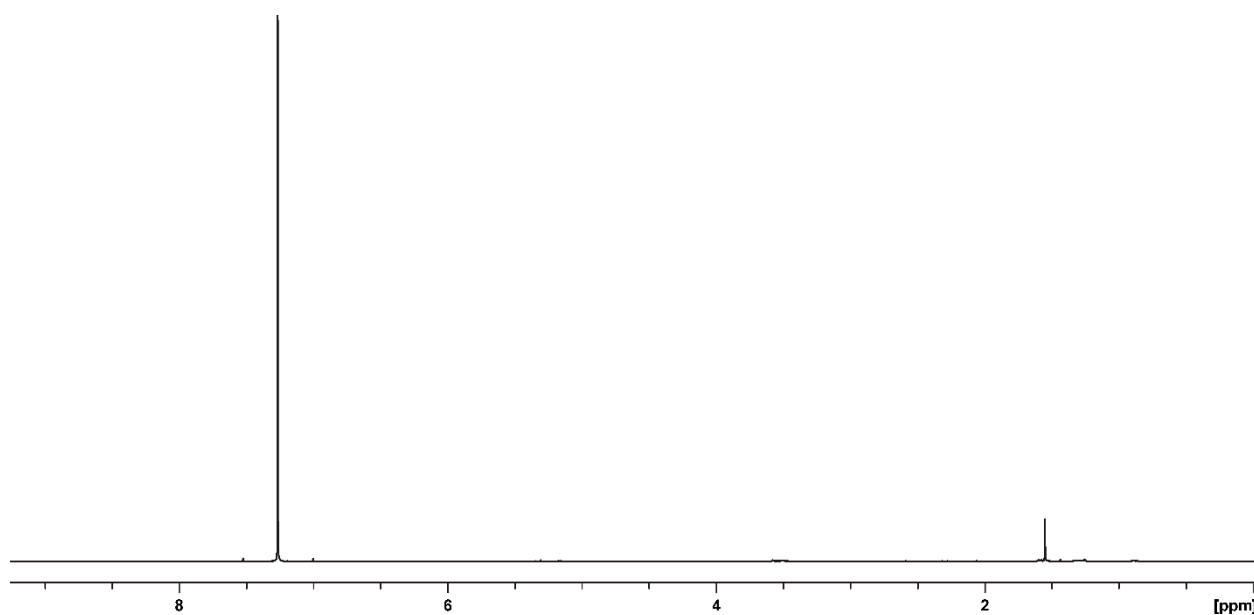

**Figure S2.** NMR spectrum of the extract of OSTE-MS after aging for 1 hour (CDCl<sub>3</sub>).

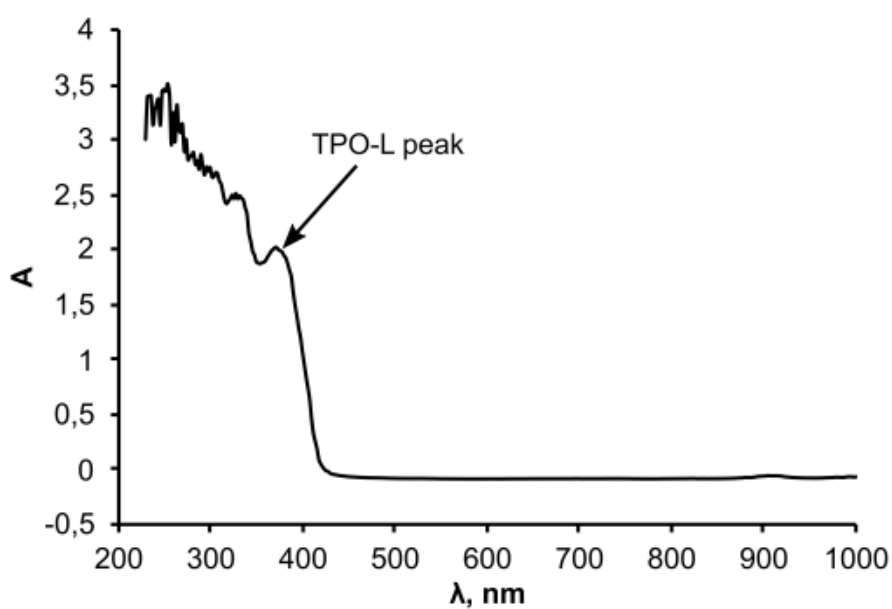

**Figure S3.** UV-light absorption spectra of OSTE-MS polymer.

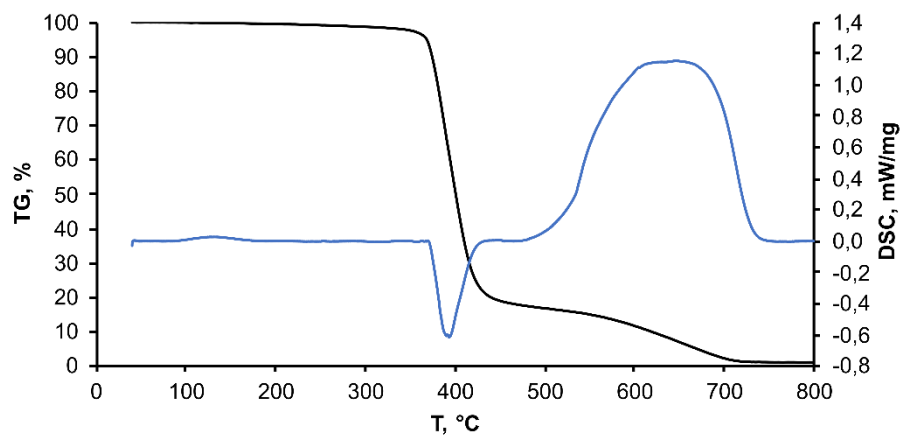

**Figure S4.** TGA curve of OSTE-MS polymer in air. Heating rate 10 °C/min.

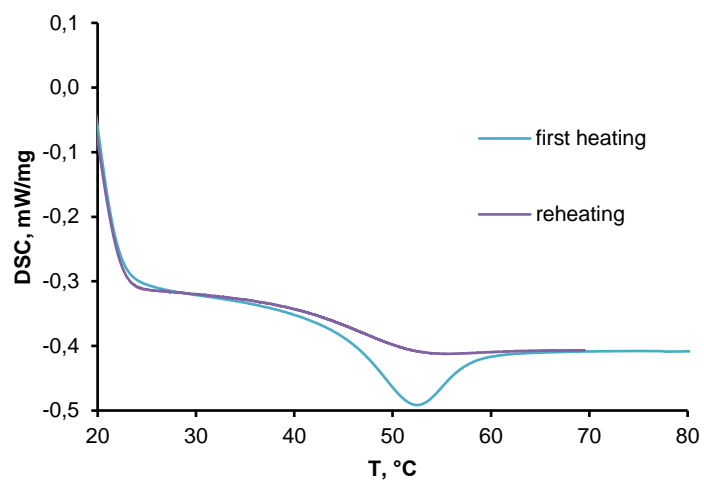

**Figure S5.** DSC curves of OSTE-MS polymer.

**Table S4.** The OSTE-MS polymer viscosity at different temperatures and mercaptosilane content in the mixture

| wt (MS), % | T, °C           |      |      |
|------------|-----------------|------|------|
|            | Viscosity, Pa·s |      |      |
|            | 0               | 6.4  | 12.1 |
| 15         | 0.95            | 0.44 | 0.26 |
| 20         | 0.66            | 0.34 | 0.21 |
| 30         | 0.47            | 0.27 | 0.18 |

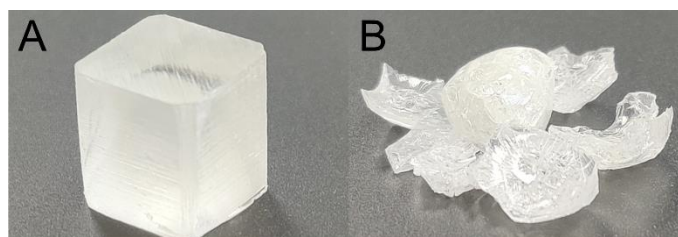

**Figure S6.** Photo of the OSTE-MS polymer cube before (A) and after (B) treatment in chloroform (24 hours).
